# Supplementary material for: Convalescent Plasma for Hospitalized COVID-19 Patients: A Single-Center Experience
Source: MDPI journal article supplement (doi:10.3390/life12030420), 2022-03-14
Supplement: s1 [file s1]

# Supplementary Material of Convalescent Plasma for Hospitalized COVID-19 Patients: A Single-Center Experience

Convalescent Plasma Study Group

Consuelo Basili,<sup>1</sup> Angela Bellani,<sup>2</sup> Alberto Biondo,<sup>3</sup> Enrico Burato,<sup>4</sup> Irene Breoni,<sup>5</sup> Beatrice Caruso,<sup>6</sup> Maria Beatrice Casarini,<sup>5</sup> Maria Giovanna Cavazzini,<sup>7</sup> Margherita Chiamenti,<sup>7</sup> Nicola Cicorella,<sup>8</sup> Paolo Costa,<sup>7</sup> Giovanni Carlo Fibbia,<sup>7</sup> Elisa Firriolo,<sup>9</sup> Sabrina Frattima,<sup>7</sup> Rino Frizzelli,<sup>5</sup> Angela Furini,<sup>10</sup> Silvia Garilli,<sup>7</sup> Gianni Gattuso,<sup>7</sup> Susy Longhi,<sup>11</sup> Francesca Losa,<sup>12</sup> Claudio Martini,<sup>5</sup> Fabia Mascaro,<sup>11</sup> Linda Maulucci,<sup>5</sup> Barbara Melara,<sup>10</sup> Elena Miglioli,<sup>13</sup> Alessandro Occhionero,<sup>7</sup> Roberto Olivetti,<sup>5</sup> Matteo Ortolani,<sup>3</sup> Solidea Palin,<sup>14</sup> Loredana Palvarini,<sup>7</sup> Giorgio Perboni,<sup>7</sup> Viviana Ravagnani,<sup>12</sup> Francesca Saggiani,<sup>5</sup> Cinzia Sissa,<sup>15</sup> Piero Superbi,<sup>16</sup> Marcello Vincenzi,<sup>7</sup> Baoran Yang,<sup>12</sup> Fabio Zacchi,<sup>7</sup> Paolo Zampriolo.<sup>14</sup>

<sup>1</sup>Medical Direction, Policlinico S. Orsola-Malpighi, Bologna, Italy;

<sup>2</sup>Department of Frailty, Carlo Poma Hospital, Azienda Socio Sanitaria Territoriale of Mantova, Italy;

<sup>3</sup>Department of Anesthesiology and Intensive Care, Carlo Poma Hospital, Azienda Socio Sanitaria Territoriale of Mantova, Italy;

<sup>4</sup>Quality, Accreditation and Risk Management Unit, Azienda Socio Sanitaria Territoriale, Mantova, Italy;

<sup>5</sup>Department of Medicine, Carlo Poma Hospital, Azienda Socio Sanitaria Territoriale of Mantova, Italy;

<sup>6</sup>Laboratory, Carlo Poma Hospital, Azienda Socio Sanitaria Territoriale, Mantova, Italy;

<sup>7</sup>Unit of Infectious Diseases, Carlo Poma Hospital, Azienda Socio Sanitaria Territoriale of Mantova, Italy;

<sup>8</sup>Division of Cardiology, Carlo Poma Hospital, Azienda Socio Sanitaria Territoriale of Mantova, Italy;

<sup>9</sup>Management Planning and Control Service, Carlo Poma Hospital, Azienda Socio Sanitaria Territoriale of Mantova, Italy;

<sup>10</sup>Emergency Department, Carlo Poma Hospital, Azienda Socio Sanitaria Territoriale of Mantova, Italy;

<sup>11</sup>Intensive Cardiopulmonary Rehabilitation Unit, Carlo Poma Hospital, Azienda Socio Sanitaria Territoriale of Mantova, Italy;

<sup>12</sup>Allergology and Clinical Immunology Unit, Department of Medicine, Carlo Poma Hospital, Azienda Socio Sanitaria Territoriale of Mantova, Italy;

<sup>13</sup>Press and Communication Office, Azienda Socio Sanitaria Territoriale of Mantova, Italy;

<sup>14</sup>Department of Obstetrics and Gynecology, Carlo Poma Hospital, Azienda Socio Sanitaria Territoriale of Mantova, Italy;

<sup>15</sup>Department of Transfusion Medicine and Hematology, Carlo Poma Hospital, Azienda Socio Sanitaria Territoriale of Mantova, Italy;

<sup>16</sup>Medical Direction, Azienda Socio Sanitaria Territoriale of Mantova, Italy.
